# Supplementary material for: Epidermal invagination and muscle rearrangement associated with the segment addition during anamorphosis in a millipede, Niponia nodulosa
Source: Research Square preprint supplement (doi:10.21203/rs.3.rs-7928597/v1), 2025-11-04
Supplement: Supplementary file 1 [file cf4faae82f9e907206a1c46f.pdf]

**Supplementary Material for: Epidermal invagination and muscle rearrangement associated with the segment addition during anamorphosis in a millipede, *Niponia nodulosa***

**Soma Chiyoda<sup>1</sup>, Kohei Oguchi<sup>1</sup>, Hitoshi Aonuma<sup>2</sup>, Toru Miura<sup>1</sup>**

<sup>1</sup>Misaki Marine Biological Station, School of Science, The University of Tokyo, Miura, Kanagawa 238-0225, Japan

<sup>2</sup>Graduate School of Science, Kobe University, Kobe, Hyogo, 657-8501, Japan

**Table S1.** Duration of intermolt in stadium VI juveniles of *N. nodulosa* reared individually.

| Individual | The day the stadium VI juvenile<br>left from the molting chamber | The day the stadium VII juvenile<br>left from the molting chamber | Number of days in between |
|------------|------------------------------------------------------------------|-------------------------------------------------------------------|---------------------------|
| #1         | 25–27 Feb. 2024                                                  | 27 May 2024                                                       | 90–92                     |
| #2         | 18 May 2024                                                      | 6 Sep. 2024                                                       | 111                       |
| #3         | 19 Dec. 2024                                                     | 23 Jan. 2025                                                      | 35                        |
| #4         | 23 Dec. 2024                                                     | 25–28 Jan. 2025                                                   | 33–36                     |
| #5         | 29 Sep. 2024                                                     | 4 Feb. 2025                                                       | 128                       |
| #6         | 7 Feb. 2025                                                      | 14–15 Mar. 2025                                                   | 35–36                     |
| #7         | 13 Feb. 2025                                                     | 25 Apr. 2025                                                      | 71                        |
| #8         | 1 May 2025                                                       | 18 Jun. 2025                                                      | 48                        |

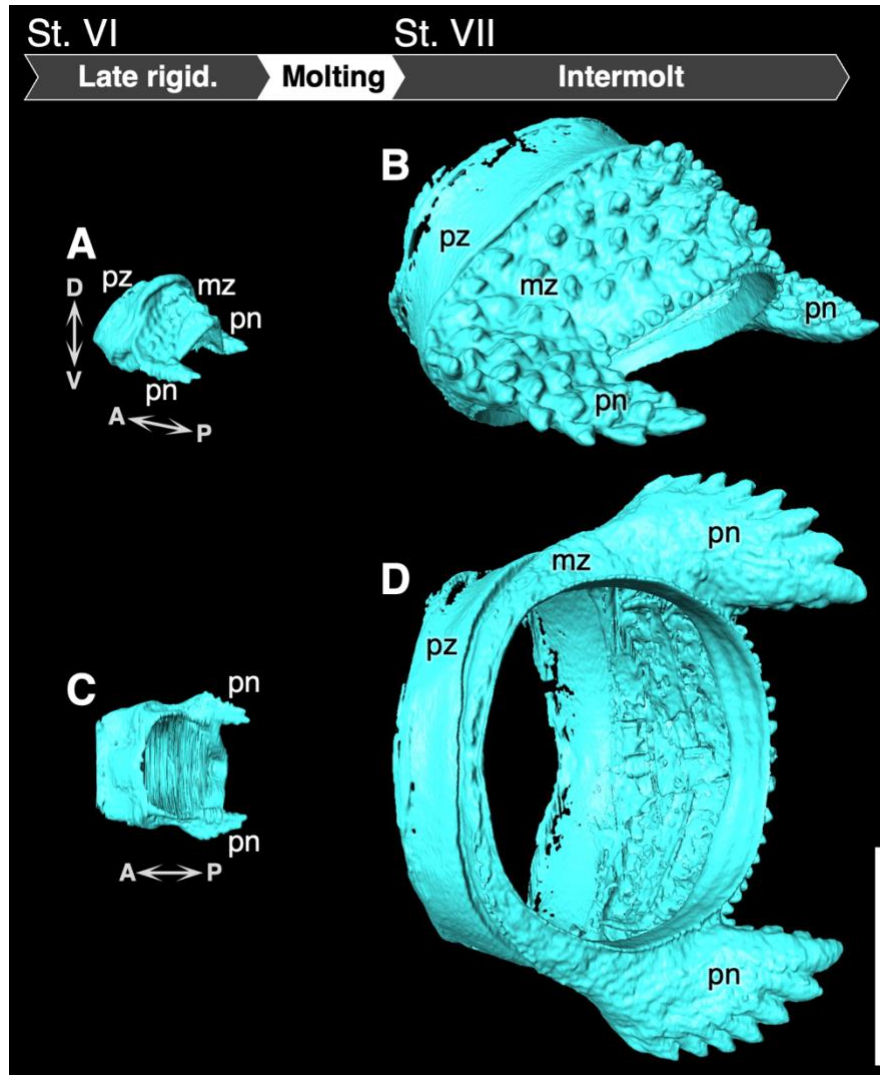

**Fig. S1** Comparison of the ring primordium in the late rigidation period of stadium VI with the completed ring 18 of stadium VII in *N. nodulosa*, based on  $\mu$ CT data. **A, B** Posterolateral views. **C, D** Ventral views. **A, C** Stadium VI, late rigidation period. **B, D** Stadium VII, intermolt period (Day 10). Not to scale in (**A, B**). Scale bars: 500  $\mu$ m (**C, D**). Abbreviations: mz, metazonite; pn, paranotum; pz, prozonite.

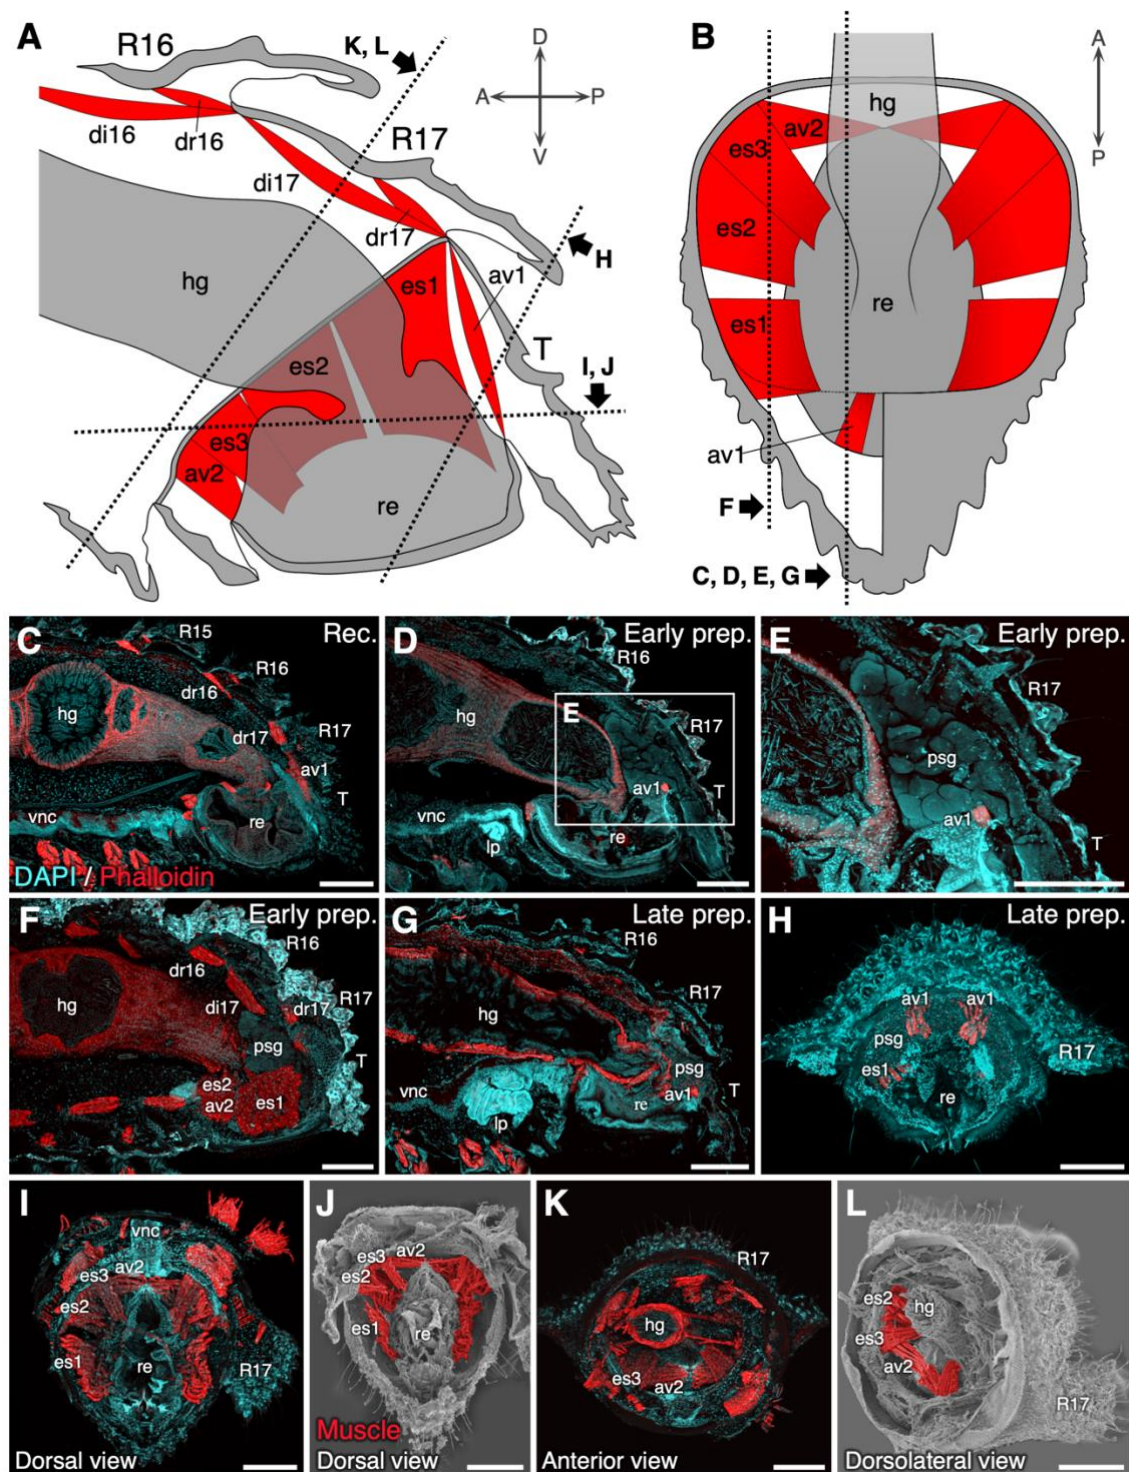

**Fig. S2** Musculature in the posterior region of stadium VI juveniles of *N. nodulosa*, based on DAPI and phalloidin staining and SEM observations. **A** Schematic diagram of musculature posterior to ring 16, lateral view, with corresponding sections in (**H–L**). **B** Schematic diagram of telson musculature, dorsal view, with corresponding sections in

(C–G). C–I, K DAPI and phalloidin staining. J, L SEM images with selected muscles pseudo-coloured in red. C Recovery period. D–F Early preparatory period; (E) shows magnified view of the boxed area in (D). G, H Late preparatory period. I–L Musculature inside telson during the intermolt period; (I, K) correspond to the same samples as (J, L), respectively. Scale bars: 200  $\mu$ m. Abbreviations: av, anal valve muscle; di17, dorsal internal muscle of ring 17; dr, dorsal retractor muscle (e.g. dr17 = dorsal retractor muscle of ring 17); es, eversible anal sac muscle; hg, hindgut; lp, leg primordia; psg, putative spinning gland; R, ring (e.g. R17 = ring 17); re, rectum; T, telson; vnc, ventral nerve cord.



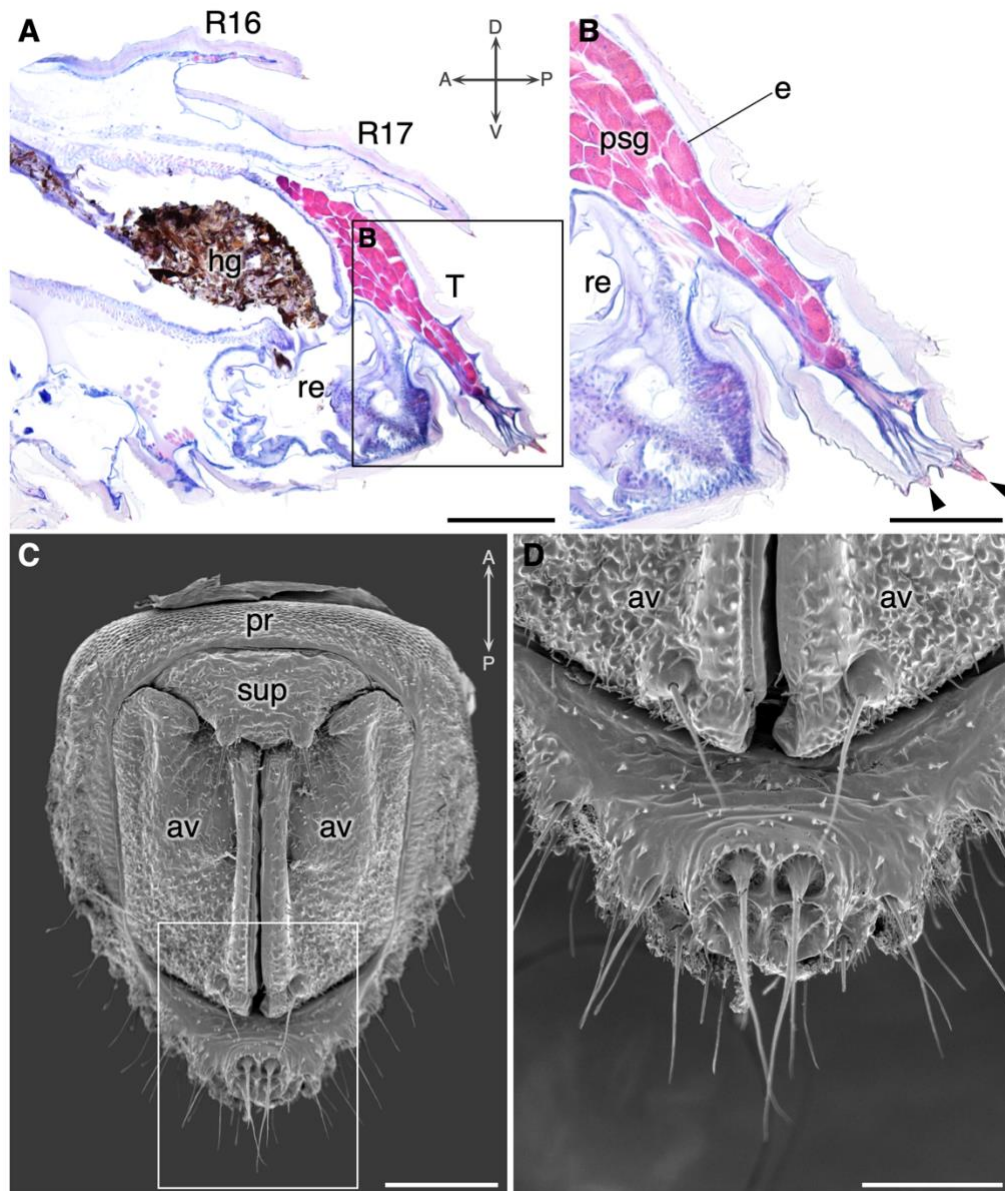

**Fig. S3** Putative spinning gland and spinnerets in the telson of *N. nodulosa*, based on histology and SEM. **A, B** Sagittal sections through the spinnerets of a stadium VI juvenile during the late preparatory period. A different section from the same individual shown in figure 4c. **(B)** shows a magnified view of the boxed area in **(A)**. Arrowheads indicate spinnerets. **C, D** SEM images of the ventral side of the telson in a stadium VII juvenile. **(D)** shows a magnified view of the boxed area in **(C)**, showing two pairs of spinnerets. Scale bars: 200  $\mu$ m (**A, C**), 100  $\mu$ m (**B, D**). Abbreviations: av, anal valve; e, epidermis; hg, hindgut; pr, preanal ring; psg, putative spinning gland; R, ring (e.g. R17 = ring 17); re, rectum; sup, subanal plate; T, telson.
